# Supplementary material for: The Tobacco β-Cembrenediol: A Prostate Cancer Recurrence Suppressor Lead and Prospective Scaffold via Modulation of Indoleamine 2,3-Dioxygenase and Tryptophan Dioxygenase
Source: MDPI journal article supplement (doi:10.3390/nu14071505), 2022-04-04
Supplement: s1 [file s1]

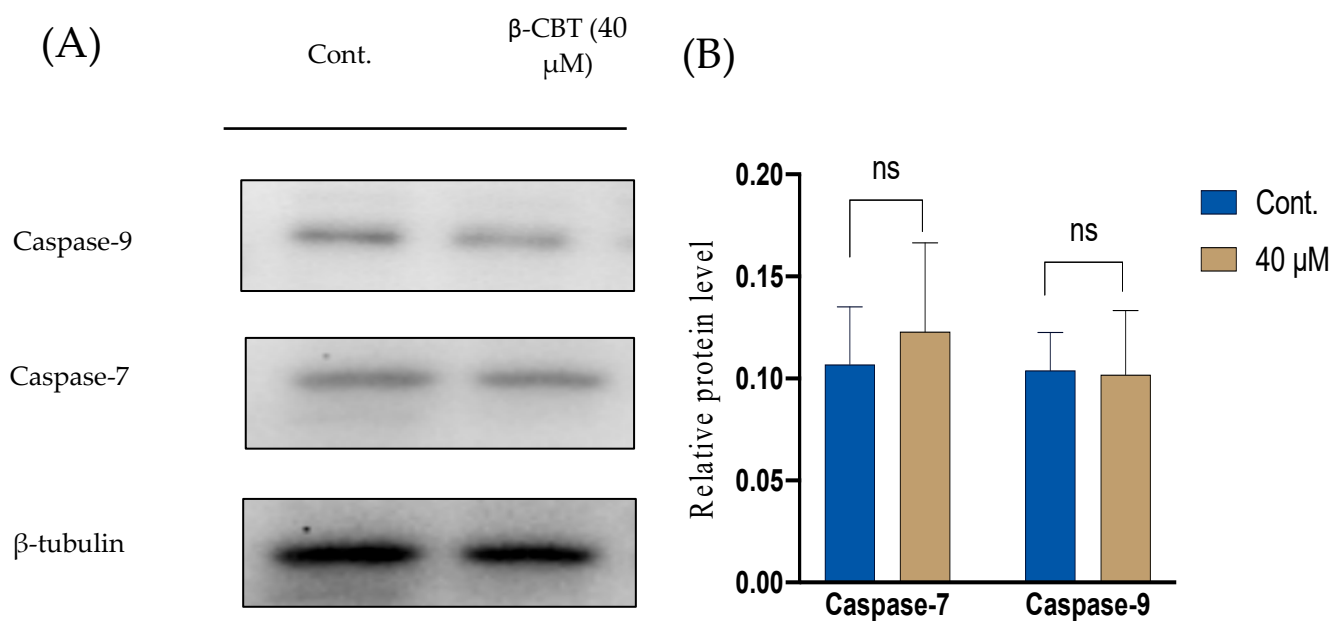

**Supplementary Figure S1:** Effects of 40  $\mu$ M  $\beta$ -CBT versus vehicle control treatments on protein level. Western blot showed no significant elevation of apoptosis markers caspase-7 and caspase -9 neither necrosis marker FAS on PC-3M cells treated with 40  $\mu$ M  $\beta$ -CBT.

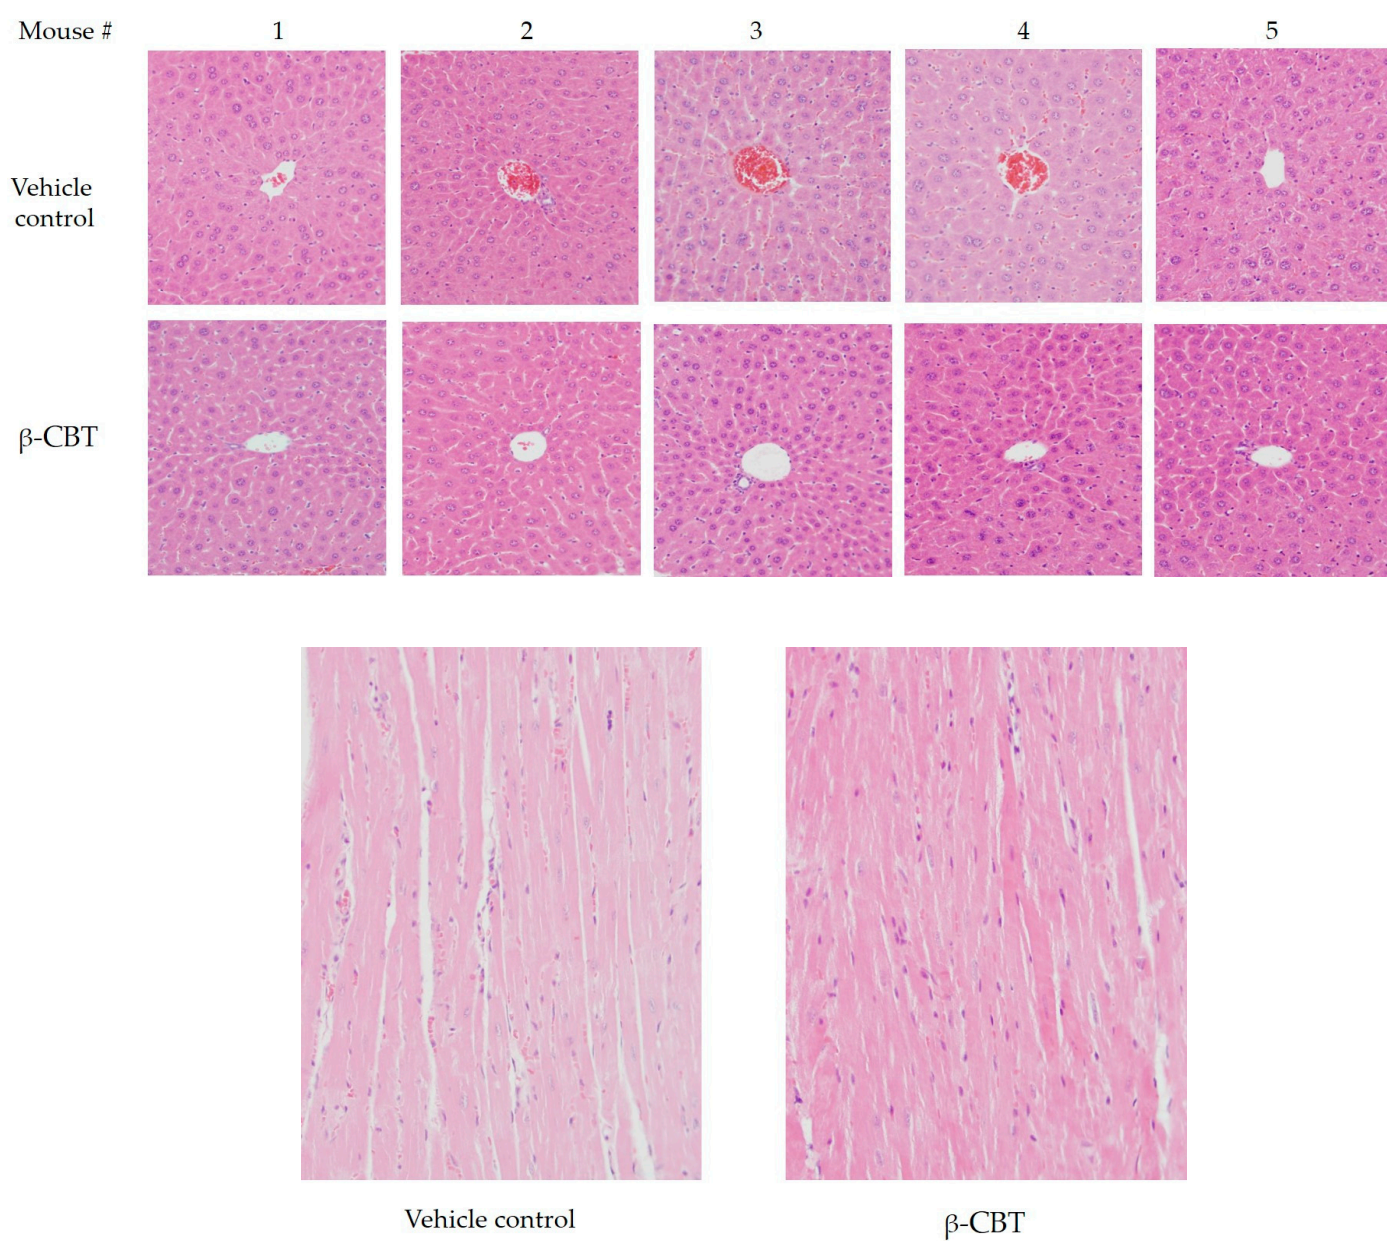

**Supplementary Figure S2:** Comparison of the histopathological effects of oral  $\beta$ -CBT (15 mg/kg) versus vehicle control treatments on the nude mouse hearts. 20x objective, 200x total magnification.
